# Supplementary material
Source: Springer Nature journal article supplement (https://www.springermedizin.de/resource/supplementary/12879_2006_458_MOESM1_ESM.pdf/9448976)

■ Symptomatic □ Positive culture ■ Culture may explain symptoms

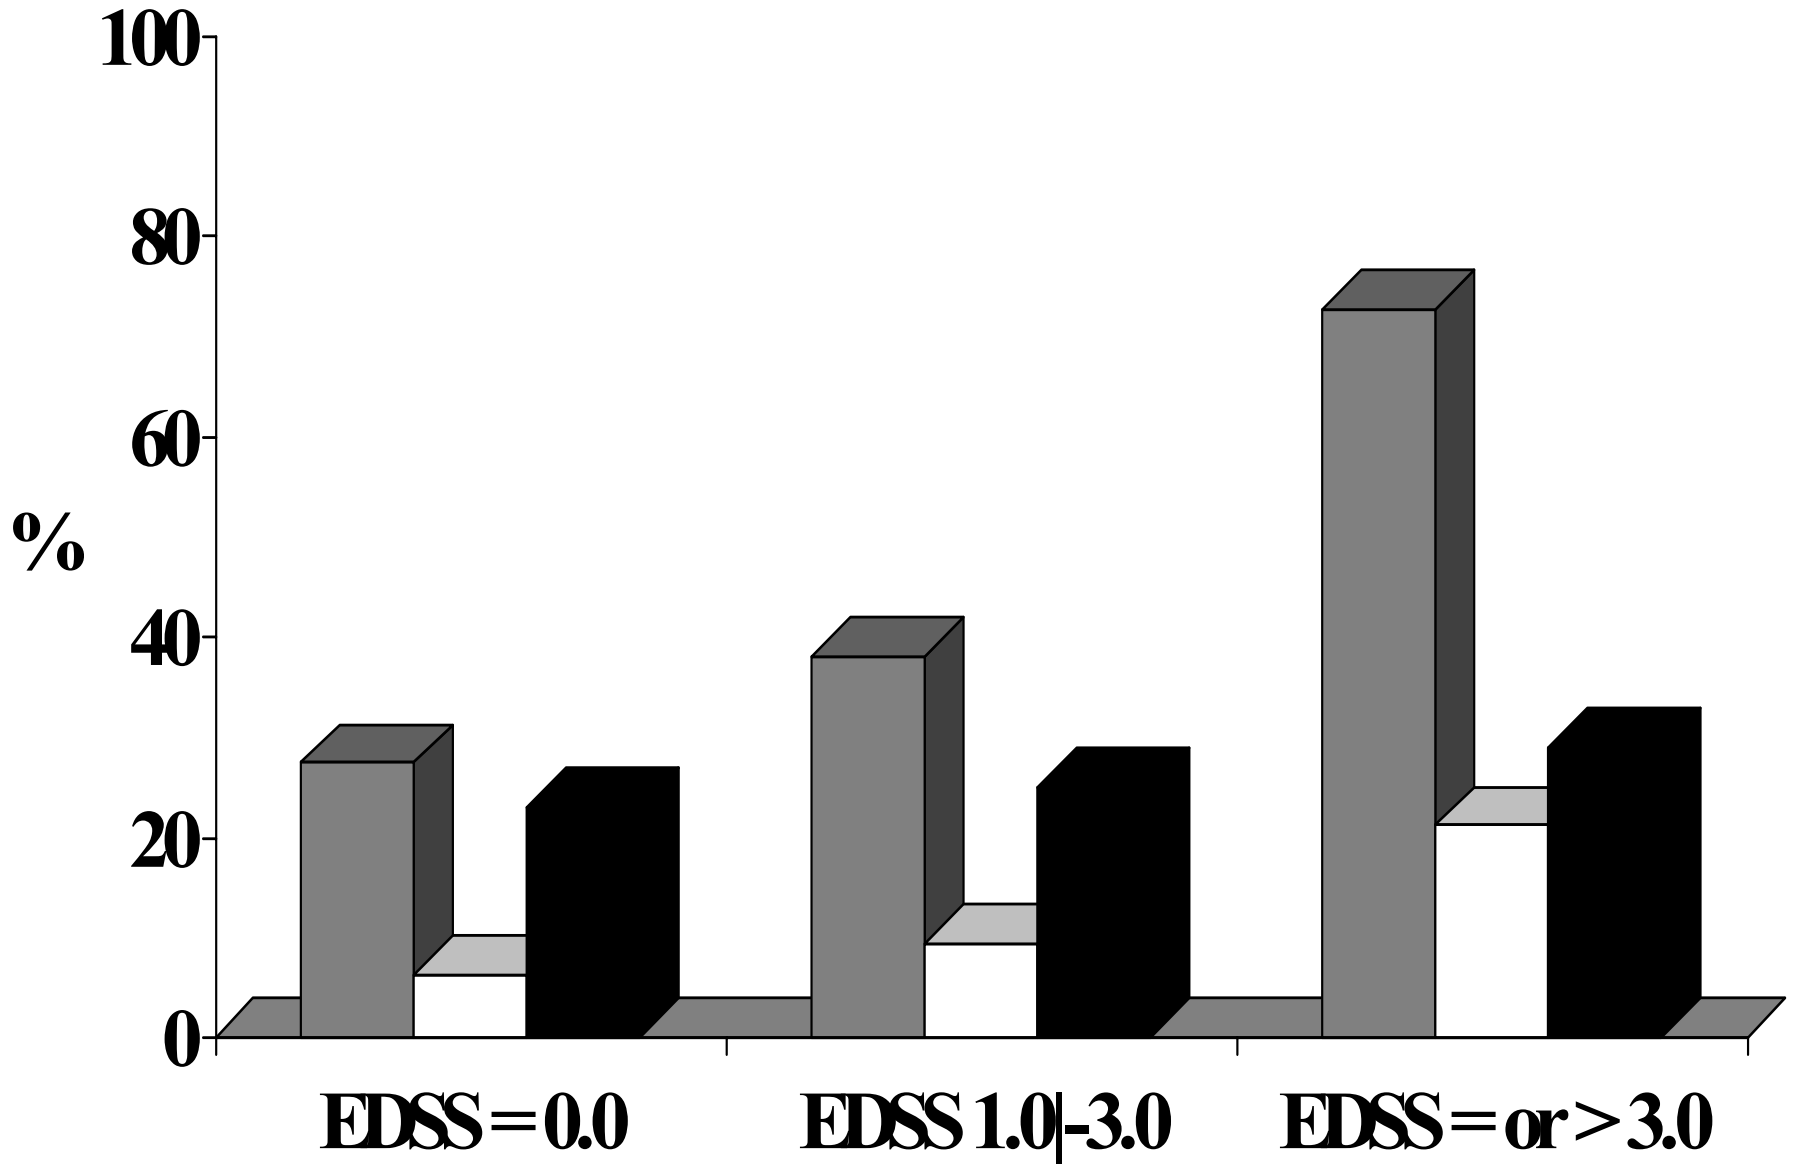

Supplement: MOESM1 [file 9448976]
